# Supplementary material for: An Essential Farnesylated Kinesin in Trypanosoma brucei
Source: PubMed Central journal article supplement (PMC3206815; doi:10.1371/journal.pone.0026508), 2011-11-02
Supplement: pone.0026508.s001.pdf [file pone.0026508.s001.pdf]

**Figure S1:**

| <b>Gene ID</b>                                         | <b>Putative Name</b>                                              | <b>CaaX</b> | <b>Mass</b> |
|--------------------------------------------------------|-------------------------------------------------------------------|-------------|-------------|
| <b>Tb927.10.12440</b><br><b>Kinesin<sup>CaaX</sup></b> | <b>kinesin-like protein</b>                                       | <b>CVIM</b> | <b>91</b>   |
| Tb10.70.0590                                           | ras-like small GTPase                                             | CVIM        | 44          |
| Tb10.70.6010                                           | syntaxin                                                          | CVFS        | 26          |
| Tb10.70.5440                                           | DNAJ                                                              | CTQQ        | 47          |
| Tb10.70.5100                                           | lysosomal alpha-mannosidase precursor                             | CTGV        | 112         |
| Tb10.70.4880                                           | eukaryotic translation initiation factor 5                        | CVAA        | 43          |
| Tb10.70.4300                                           | U2 splicing auxiliary factor                                      | CPLK        | 29          |
| Tb10.70.4100                                           | protein kinase                                                    | CIIM        | 99          |
| Tb10.70.2270                                           | protein phosphatase 2C-like                                       | CSER        | 32          |
| Tb927.10.6070                                          | universal minicircle sequence binding protein (UMSBP)             | CPVK        | 15          |
| Tb10.70.0350                                           | serine-threonine protein phosphatase, 2b catalytic subunit A2     | CEGA        | 44          |
| Tb10.6k15.1990                                         | RAB1 small G-protein                                              | CSVM        | 25          |
| Tb10.6k15.1790                                         | rab-like GTPase activating protein                                | CQQL        | 39          |
| Tb10.389.1800                                          | vesicle-associated membrane protein (VAMP); syntaxin-like protein | CTLM        | 33          |
| Tb10.61.1330                                           | nucleosome assembly protein                                       | CKHQ        | 41          |
| Tb11.01.1160                                           | lipoate protein ligase                                            | CELE        | 30          |
| Tb11.01.1740                                           | 2-oxoglutarate dehydrogenase E1 component                         | CVFS        | 113         |

|                      |                                                              |      |     |
|----------------------|--------------------------------------------------------------|------|-----|
| Tb11.01.2530         | kinesin-like protein                                         | CVTM | 70  |
| Tb11.01.3915         | RNA-binding protein                                          | CITA | 15  |
| Tb11.01.4450         | cyclin-1; serine peptidase family S51, peptidase E           | CAPR | 42  |
| Tb11.01.6170         | cleavage and polyadenylation specificity factor-like protein | CGLF | 159 |
| Tb11.01.6250         | expression site-associated gene 11 (ESAG 11) protein         | CTVL | 42  |
| Tb11.47.0002         | phosphatidylinositol (3,5) kinase                            | CSLA | 160 |
| Tb11.02.1380         | TRYPARP actin-like protein                                   | CKCQ | 48  |
| Tb11.02.3850         | TBRLP GTP binding protein                                    | CTML | 25  |
| Tb11.02.5060         | SNF2/RAD54 related DNA helicase                              | CPTV | 107 |
| Tb11.02.5470         | vacuolar type H <sup>+</sup> ATPase subunit                  | CDSS | 26  |
| Tb11.02.5700         | endonuclease/exonuclease/phosphatase                         | CLSS | 60  |
| Tb11.03.0250         | CYPA cyclophilin a                                           | CGQL | 19  |
| Tb11.24.0007         | variant surface glycoprotein (VSG, atypical)                 | CSIL | 52  |
| Tb927.1.5330         | variant surface glycoprotein (VSG)                           | CKDF | 57  |
| Tb927.2.5160/30J2.30 | chaperone protein DnaJ                                       | CTQQ | 44  |
| Tb927.2.5800/1F7.270 | SBPase sedoheptulose-1,7-bisphosphatase                      | CSKL | 36  |
| Tb03.6N20.110        | variant surface glycoprotein (VSG)                           | CFLF | 61  |
| Tb927.3.5230         | DNA repair protein                                           | CNDE | 50  |
| Tb04.2L9.1220        | protein kinase                                               | CHCM | 76  |
| Tb04.1D20.140        | divalent cation tolerance protein                            | CSCR | 13  |
| Tb04.3M17.290        | metal-ion transporter                                        | CGTV | 51  |

|                 |                                                      |      |     |
|-----------------|------------------------------------------------------|------|-----|
| Tb04.3M17.800   | phosphoglycan beta 1,3 galactosyltransferase         | CFQH | 44  |
| Tb05.30H13.730  | mitochondrial carrier protein                        | CAPA | 34  |
| Tb05.45E22.780  | protein kinase                                       | CEEG | 39  |
| Tb05.25P15.370  | variant surface glycoprotein (VSG)                   | CLIL | 58  |
| Tb927.6.5020    | CYC7 cyclin 7, putative; CYC2-like cyclin            | CLYM | 25  |
| Tb07.43M14.520  | heat shock protein DnaJ                              | CTAQ | 36  |
| Tb07.26A24.370  | cyclophilin-type peptidyl-prolyl cis-trans isomerase | CGVL | 19  |
| Tb08.26A17.100  | (H <sup>+</sup> )-ATPase G subunit                   | CQDN | 13  |
| Tb08.28F14.330  | mannosyl-oligosaccharide 1,2-alpha-mannosidase IB    | CFFF | 49  |
| Tb08.11J15.1190 | protein tyrosine phosphatase                         | CAIM | 19  |
| Tb08.10K10.800  | peptidase, metallo-peptidase, Clan ME, Family M16    | CRTF | 119 |
| Tb09.160.2210   | glutaredoxin-like protein                            | CRDL | 24  |
| Tb09.211.3650   | phospholipase A2-like protein                        | CSTC | 50  |
| Tb09.211.3680   | chaperone protein DNAJ                               | CVHQ | 49  |
| Tb09.211.4610   | vesicle-associated membrane protein                  | CTVM | 23  |
| Tb09.244.2070   | GTP-binding protein                                  | CCCQ | 31  |
| Tb09.244.0250   | variant surface glycoprotein (VSG)                   | CLLL | 53  |
| Tb11.1130       | variant surface glycoprotein (VSG)                   | CKDG | 50  |
