# Supplementary material for: An Essential Farnesylated Kinesin in Trypanosoma brucei
Source: PubMed Central journal article supplement (PMC3206815; doi:10.1371/journal.pone.0026508), 2011-11-02

S3

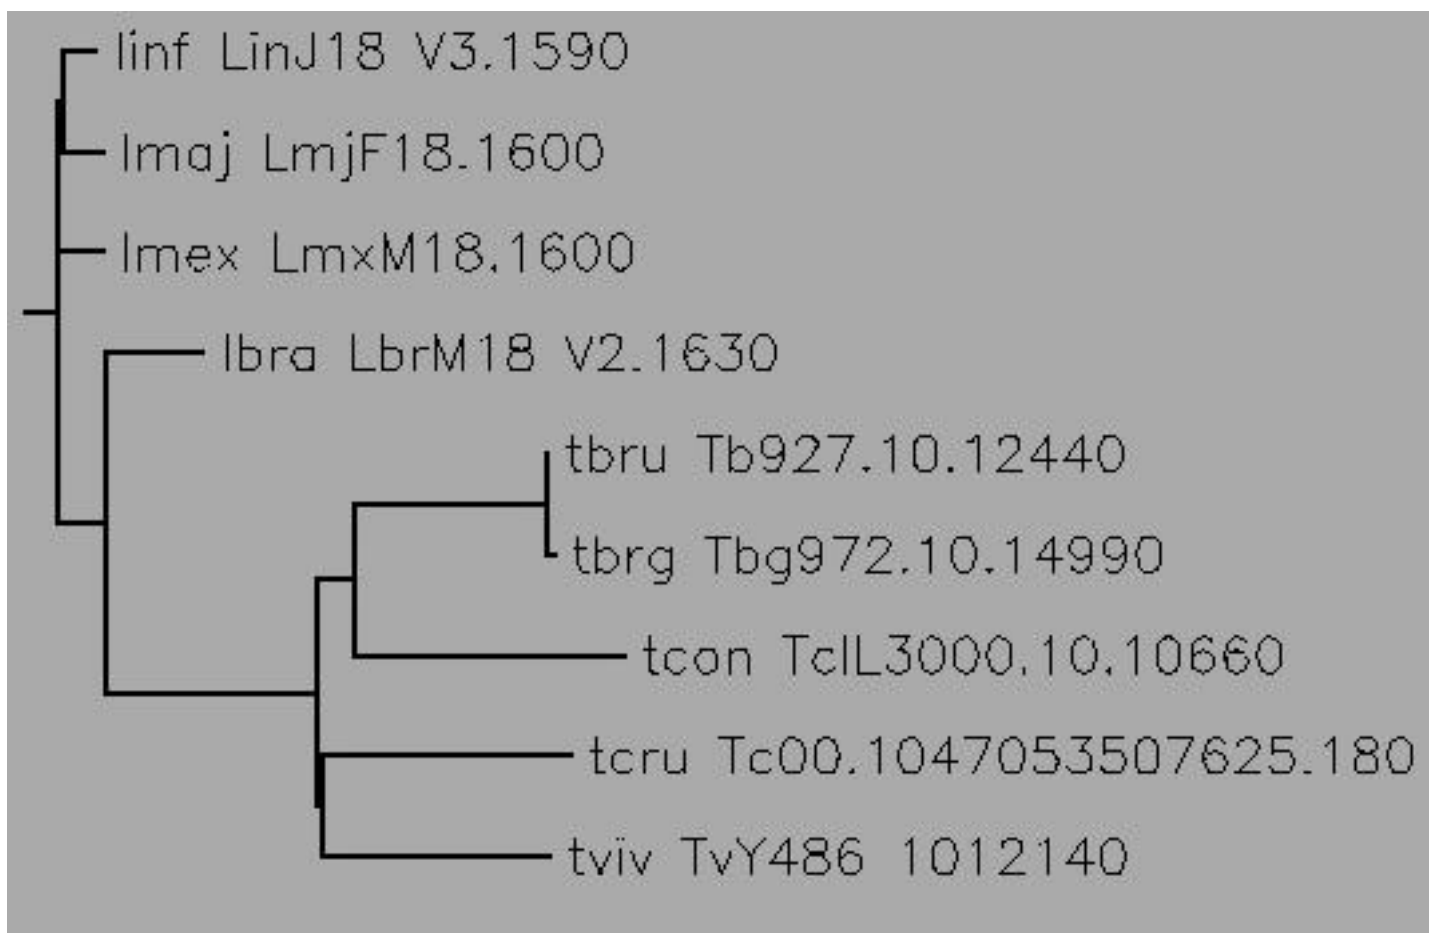

Supplement: pone.0026508.s003.pdf [file pone.0026508.s003.pdf]
